# Supplementary material
Source: PubMed Central journal article supplement (PMC193592)

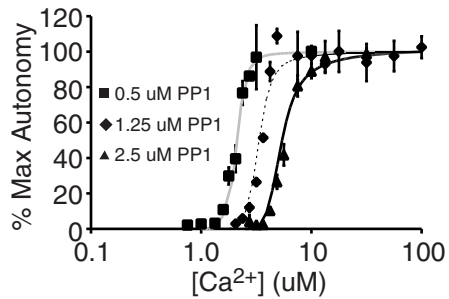

Supplement: pnas_1932759100_10.pdf [file pnas_1932759100_10.pdf]
